# Supplementary material for: Long-chain fluorocarbon-driven hybrid solid polymer electrolyte for lithium metal batteries
Source: Royal Society of Chemistry journal article supplement (doi:10.1039/d1ta10728c), 2022-01-01
Supplement: d1ta10728c1.pdf [file d1ta10728c1.pdf]

## **ELECTRONIC SUPPORTING INFORMATION**

### **Long-chain fluorocarbon driven hybrid solid polymer electrolyte for lithium metal battery**

Shuai Hao,<sup>ab</sup> Lei Li,<sup>a</sup> Wendong Cheng,<sup>a</sup> Qiwen Ran,<sup>a</sup> Yuyao Ji,<sup>a</sup> Yuxuan Wu,<sup>a</sup> Jinsheng Huo,<sup>a</sup> Yingchun Yang<sup>\*b</sup> and Xingquan Liu<sup>\*a</sup>

<sup>a</sup> School of Materials and Energy, University of Electronic Science and Technology of China, Chengdu 610054, Sichuan, China. E-mail: Lxquan@uestc.edu.cn

<sup>b</sup> College of Resources and Environment, Chengdu University of Information Technology, Chengdu 610225, Sichuan, China. E-mail: yangyingchun@cuit.edu.cn

Additional figures and tables

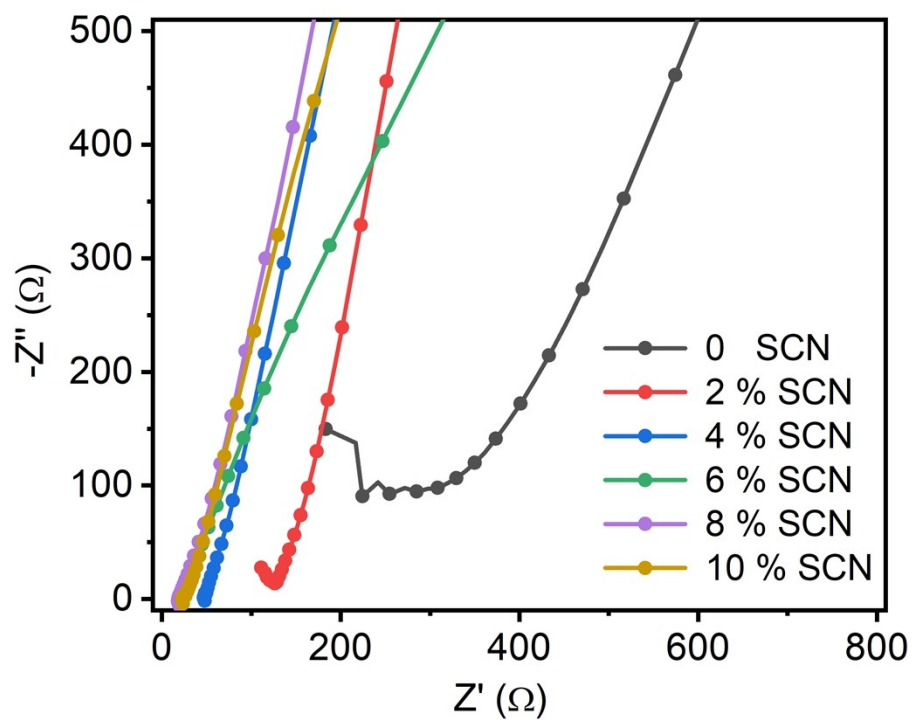

**Fig. S1.** Nyquist plots of P(DFMA-co-MMA)-xSCN-LiTFSI electrolyte membranes at 25 °C, which were prepared with various contents of SCN in P(DFMA-co-MMA).

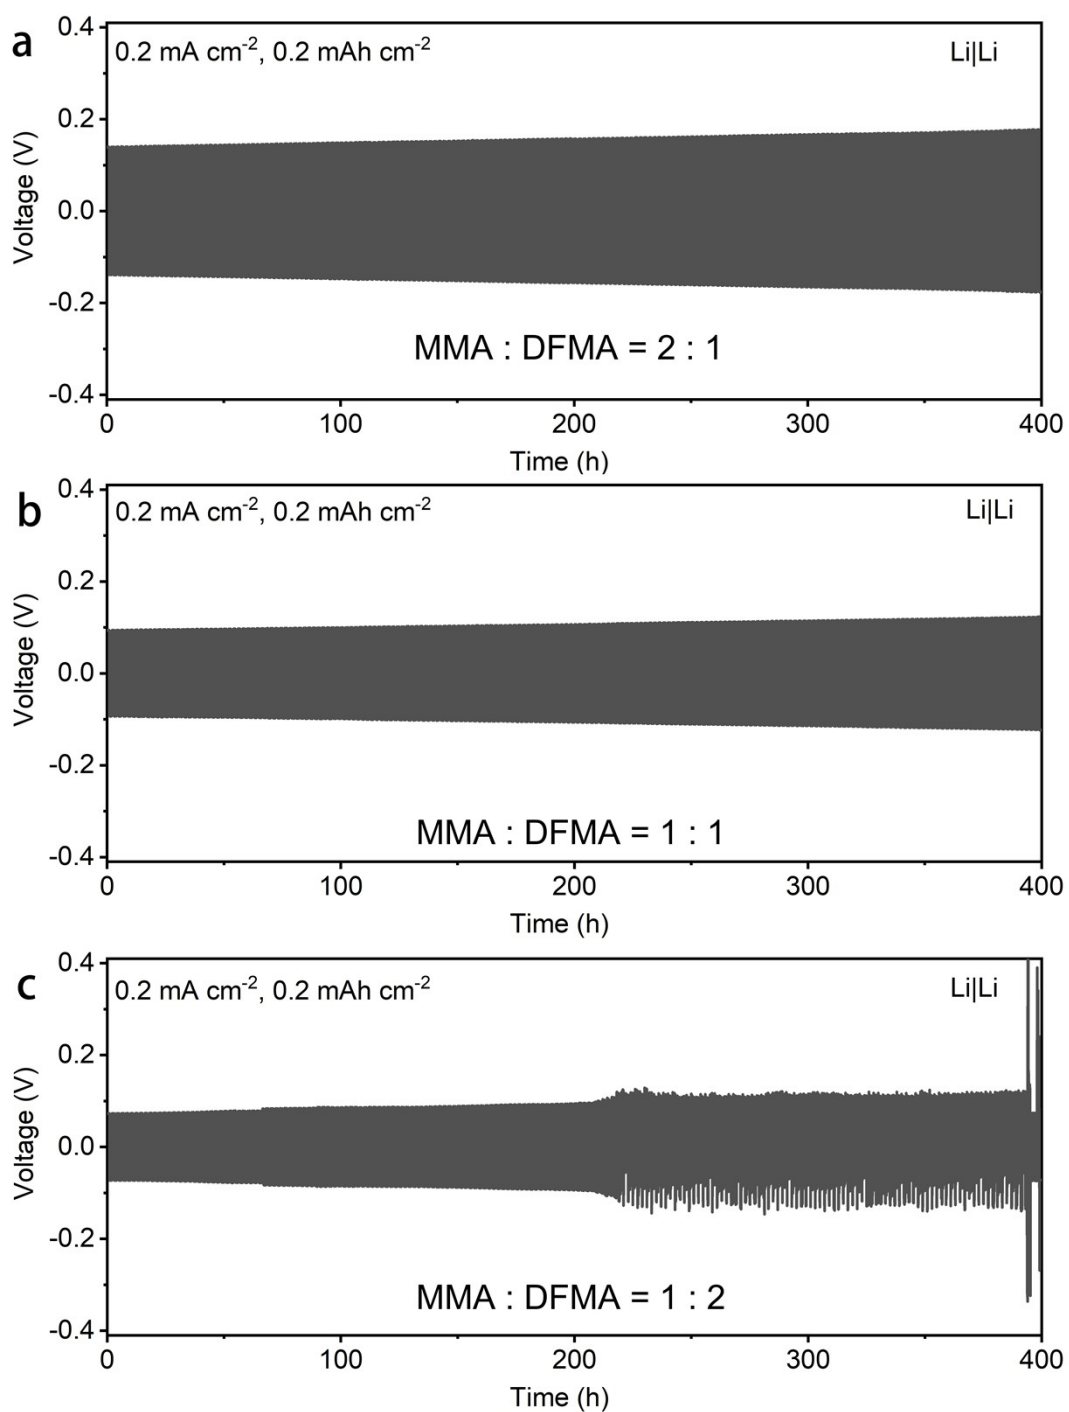

**Fig. S2.** The 200 cycles of Li symmetric cells with different ratios of DFMA and MMA.

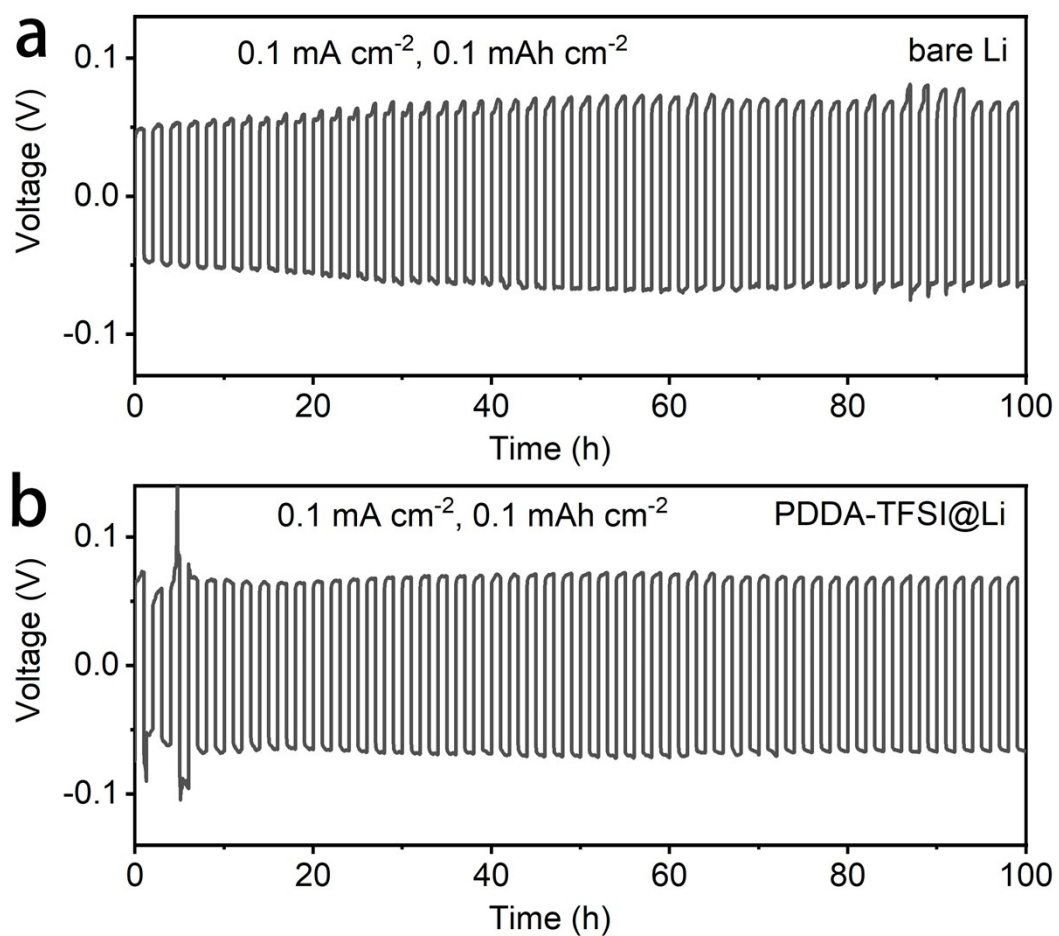

**Fig. S3.** The 50 cycles of (a) bare Li and (b) PDDA-TFSI@Li symmetric cells with LFSPE.

**Table S1.** Performance parameter and the application in the lithium battery of solid polymer electrolytes with SCN additives. (In some studies, succinonitrile is abbreviated

| Solid electrolytes                             | Ionic conductivity (S cm <sup>-1</sup> ) | Electrochemical windows | Battery configuration                                                    | Refs.     |
|------------------------------------------------|------------------------------------------|-------------------------|--------------------------------------------------------------------------|-----------|
| LFSPE                                          | $6.78 \times 10^{-4}$ (25 °C)            | 4.713 V                 | LCO/LFP/NCM811                                                           | This work |
| PSF-PEO <sub>35</sub> +LiTFSI+SCN              | $1.6 \times 10^{-4}$ (25 °C)             | 4.2 V                   | LFP                                                                      | 1         |
| PIL-SCN-PCE                                    | $6.54 \times 10^{-4}$ (25 °C)            | 5.4 V                   | LFP                                                                      | 2         |
| C-PCE                                          | $2.1 \times 10^{-4}$ (25 °C)             | 4.5 V                   | Li <sub>4</sub> Ti <sub>5</sub> O <sub>12</sub>                          | 3         |
| PEO-SCN                                        | $1.9 \times 10^{-4}$ (25 °C)             | 4.7 V                   | LFP                                                                      | 4         |
| SN-SPE                                         | $4.6 \times 10^{-4}$ (25 °C)             | 4.6 V                   | LFP                                                                      | 5         |
| PEO/PVDF/LiClO <sub>4</sub> /SN                | $2.8 \times 10^{-5}$ (25 °C)             | 4.5 V                   | LFP                                                                      | 6         |
| PEO-SN <sub>25</sub> -LiTFSI <sub>10</sub> -GF | $2.85 \times 10^{-4}$ (25 °C)            | 5.5 V                   | LFP                                                                      | 7         |
| PEO-SN-LiTFSI                                  | $3.38 \times 10^{-4}$ (25 °C)            | 4.8 V                   | LFP                                                                      | 8         |
| PIPCE                                          | $\sim 3.1 \times 10^{-4}$ (30 °C)        | 4.97 V                  | NCM532                                                                   | 9         |
| TXE-SN-LiDFOB                                  | $1.14 \times 10^{-4}$ (30 °C)            | 4.5 V                   | LCO                                                                      | 10        |
| SN-PC-PEGDGE                                   | $1.4 \times 10^{-5}$ (25 °C)             | -                       | -                                                                        | 11        |
| CPE-SCN                                        | $2.57 \times 10^{-4}$ (30 °C)            | 4.7 V                   | LFP/NCM111                                                               | 12        |
| DLPE                                           | $1.54 \times 10^{-4}$ (20 °C)            | 5 V                     | LFP/NCM811                                                               | 13        |
| PVA/PAN/SN/LATP/LiTFSI                         | $1.13 \times 10^{-4}$ (25 °C)            | 5.1 V                   | LFP                                                                      | 14        |
| SPI-LAGP-SPI                                   | $1.4 \times 10^{-4}$ (25 °C)             | 4.8 V                   | LiNi <sub>0.8</sub> Co <sub>0.15</sub> Al <sub>0.05</sub> O <sub>2</sub> | 15        |
| PEM-PEG3A                                      | $3.41 \times 10^{-4}$ (21 °C)            | 4.5 V                   | LFP                                                                      | 16        |
| PPC-SCN                                        | $2.18 \times 10^{-4}$ (25 °C)            | 4.7 V                   | LFP                                                                      | 17        |
| PCL/SN/PAN                                     | $4 \times 10^{-4}$ (25 °C)               | 4.5 V                   | LFP                                                                      | 18        |
| N-PCPE                                         | $5.7 \times 10^{-4}$ (25 °C)             | >2.7 V                  | LCO                                                                      | 19        |
| PEO-SN                                         | $1.19 \times 10^{-4}$ (25 °C)            | 5 V                     | NCM811                                                                   | 20        |
| PEO/LiTFSI/SN/LAO                              | $1.36 \times 10^{-5}$ (30 °C)            | 5.2 V                   | LFP                                                                      | 21        |
| PSSE                                           | $2.5 \times 10^{-4}$ (25 °C)             | 4.63 V                  | LTO@VG/LFP                                                               | 22        |
| SPE-14-15                                      | $1.26 \times 10^{-4}$ (30 °C)            | 4.9 V                   | LFP                                                                      | 23        |

as SN)

**Table S2.** Performance parameter and the application in the lithium battery of solid

| Solid electrolytes                                 | Ionic conductivity (S cm <sup>-1</sup> ) | Electrochemical windows | Battery configuration                                                                       | Refs.     |
|----------------------------------------------------|------------------------------------------|-------------------------|---------------------------------------------------------------------------------------------|-----------|
| LFSPE                                              | $6.78 \times 10^{-4}$ (25 °C)            | 4.713 V                 | LCO/LFP/<br>NCM811                                                                          | This work |
| (PEG-HDIIt)/LiTFSI                                 | $6.51 \times 10^{-5}$ (25 °C)            | 4.65 V                  | LFP/<br>LiNi <sub>0.8</sub> Co <sub>0.15</sub> Al<br>0.05O <sub>2</sub>                     | 24        |
| PCL/LiTFSI                                         | $2.5 \times 10^{-5}$ (25 °C)             | 4.6 V                   | LiNi <sub>0.6</sub> Co <sub>0.2</sub> Mn<br>0.2O <sub>2</sub>                               | 25        |
| P(STFSILi)-PEO-<br>P(STFSILi)                      | $1.3 \times 10^{-5}$ (60 °C)             | 5 V                     | LFP                                                                                         | 26        |
| PEO/LiTFSI                                         | $1.9 \times 10^{-6}$ (25 °C)             | -                       | -                                                                                           | 27        |
| PIL-PEO/LiTFSI                                     | $6.12 \times 10^{-4}$ (55 °C)            | 5.44 V                  | LFP                                                                                         | 28        |
| PEO/LiTFSI-SNps                                    | $4.35 \times 10^{-4}$ (30 °C)            | 5.18 V                  | LFP/LCO                                                                                     | 29        |
| SPEs with<br>nanowires                             | $6.05 \times 10^{-5}$ (30 °C)            | -                       | -                                                                                           | 30        |
| PEO-ta-POSS                                        | $1.2 \times 10^{-3}$ (90 °C)             | 3.8 V                   | V <sub>2</sub> O <sub>5</sub>                                                               | 31        |
| PDADMA<br>NTf <sub>2</sub> /LiFSI/PVDF             | $2.64 \times 10^{-4}$ (25 °C)            | 4.5 V                   | LiNiMnCoO <sub>2</sub> /<br>LiNi <sub>0.8</sub> Co <sub>0.15</sub> Al<br>0.05O <sub>2</sub> | 32        |
| PI/PEO/LiTFSI                                      | $2.3 \times 10^{-4}$ (30 °C)             | -                       | LFP                                                                                         | 33        |
| PEO-5% g-C <sub>3</sub> N <sub>4</sub> -<br>LiTFSI | $1.52 \times 10^{-4}$ (60 °C)            | 4.7 V                   | LFP                                                                                         | 34        |
| PEO/LiTFSI/10%<br>VS                               | $2.9 \times 10^{-5}$ (25 °C)             | 5.35 V                  | LFP                                                                                         | 35        |
| PEO-n-UIO-LiTFSI                                   | $1.3 \times 10^{-4}$ (30 °C)             | 4.5 V                   | LFP                                                                                         | 36        |
| PEO-LiTFSI-1%<br>Li <sub>2</sub> S                 | $2.52 \times 10^{-4}$ (50 °C)            | -                       | NCM811                                                                                      | 37        |
| PEO-VAVS-LiTFSI                                    | $1.89 \times 10^{-4}$ (50 °C)            | -                       | LFP                                                                                         | 38        |
| (PMHS-<br>PEO)/LiTFSI                              | $10^{-5}$ (25 °C)                        | 5.2 V                   | LFP                                                                                         | 39        |
| (PEO-sulfur-<br>PEGMA)/LiTFSI                      | $2.13 \times 10^{-4}$ (50 °C)            | 5.4 V                   | LFP                                                                                         | 40        |

hybrid polymer electrolyte.

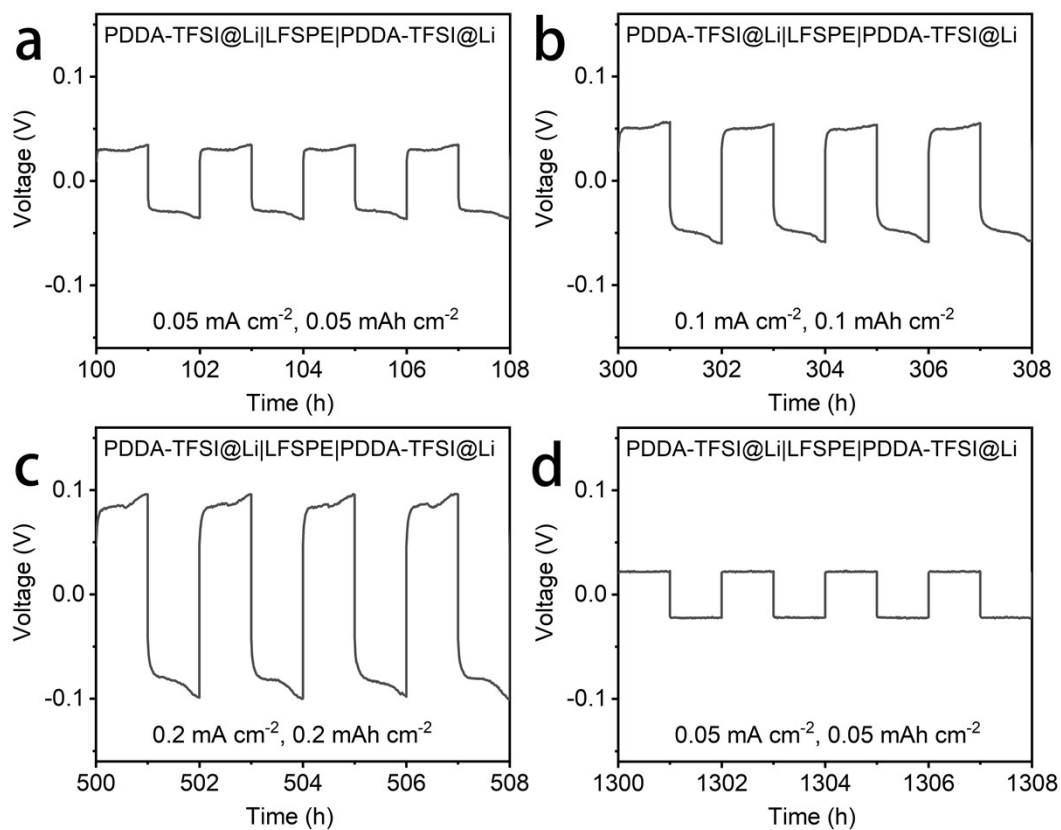

**Fig. S4.** Magnified areas of Li plating\stripping curves of the LFSPE symmetric cell at different current densities.

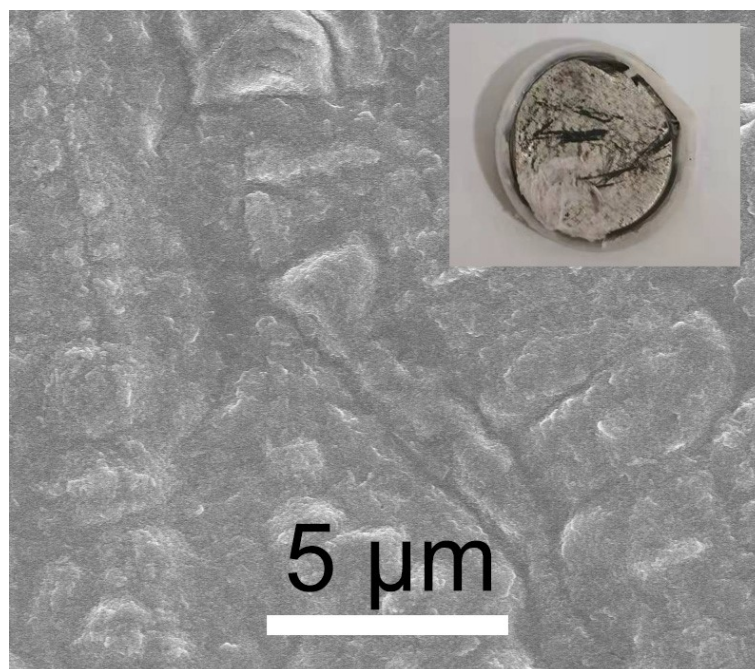

**Fig. S5.** SEM image and digital image of cycled PDDA-TFSI@Li electrode over 2000 h from LFSPE symmetric cell. The scratches on the surface are the result of artificial etching, indicating that even after the cyclic reaction, the coating can still effectively avoid the oxidation reaction of lithium metal exposed to the air. The white fibers on the surface prove that the electrolyte membrane in the battery is closely attached to the anode.



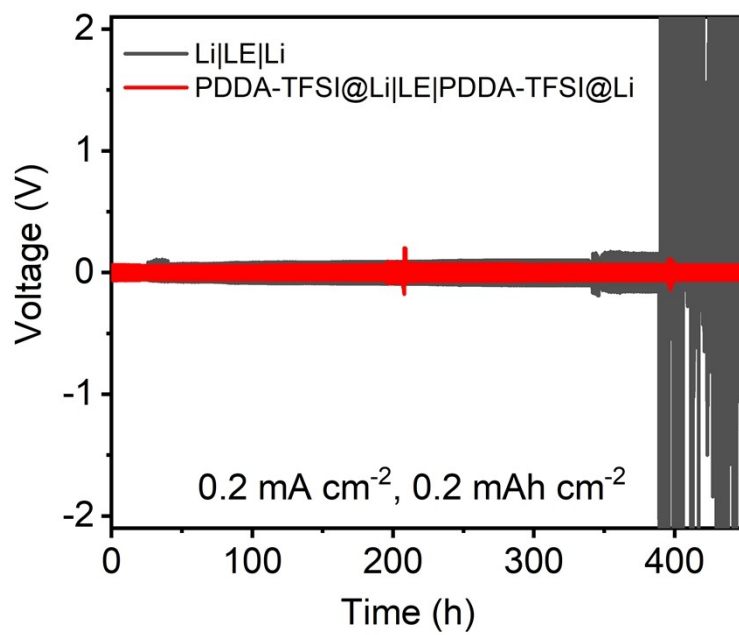

**Fig. S6.** The cycling performances of bare Li and PDDA-TFSI@Li symmetric cells with liquid electrolyte.

## References

- 1 C. Sun, Z. Wang, L. Yin, S. Xu, Z. A. Ghazi, Y. Shi, B. An, Z. Sun, H.-M. Cheng and F. Li, *Nano Energy*, 2020, **75**, 104976.
- 2 Q. Lu, J. Fang, J. Yang, G. Yan, S. Liu and J. Wang, *J. Membrane Sci.*, 2013, **425-426**, 105-112.
- 3 K. Liu, Q. Zhang, B. P. Thapaliya, X. -G. Sun, F. Ding, X. Liu, J. Zhang and S. Dai, *Solid State Ionics*, 2020, **345**, 115159.
- 4 B. Zhao, M. Yang, J. Li, S. Li, G. Zhang, S. Liu, Y. Cui and H. Liu, *Energy Technol.*, 2021, **9**, 2100114.
- 5 S. Xu, Z. Sun, C. Sun, F. Li, K. Chen, Z. Zhang, G. Hou, H. -M. Cheng and F. Li, *Adv. Funct. Mater.*, 2020, **30**, 2007172.
- 6 Z. Yang, Y. Luo, X. Gao and R. Wang, *ChemElectroChem.*, 2020, **7**, 2599-2607.
- 7 H. Wang, C. Lin, X. Yan, A. Wu, S. Shen, G. Wei and J. Zhang, *Electroanal. Chem.*, 2020, **869**, 114156.
- 8 J. Wang, J. Yang, L. Shen, Q. Guo, H. He and X. Yao, *ACS Appl. Energy Mater.*, 2021, **4**, 4129-4137.
- 9 C. Xu, Y. Jiang, K. Xu, Z. Chen, W. Chang, N. Cen, J. Ni, R. Xu, Y. Huang, P. Abulaiti, A. Tuohetimiti, C. Lai and C. Peng, *ACS Appl. Mater. Interface*, 2022, **14**, 2805-2816.
- 10 Y. Liu, Y. Zhao, Wei Lu, L. Sun, L. Lin, M. Zheng, X. Sun and H. Xie, *Nano Energy*, 2021, **88**, 106205.
- 11 H. Wu, B. Tang, X. Du, J. Zhang, X. Yu, Y. Wang, J. Ma, Q. Zhou, J. Zhao, S. Dong, G. Xu, J. Zhang, H. Xu, G. Cui and L. Chen, *Adv. Sci.*, 2020, **7**, 2003370.
- 12 J. Choi, O. Zabihi, R. J. Varley, B. Fox and M. Naebe, *Mater. Today Chem.*, 2022, **23**, 100663.
- 13 L. Gao, B. Tang, H. Jiang, Z. Xie, J. Wei and Z. Zhou, *Adv. Sustain. Syst.*, 2021, 2100389.

- 14 K. Wen, X. Tan, T. Chen, S. Chen and S. Zhang, *Energy Storage Mater.*, 2020, **32**, 55-64.
- 15 H. K. Tran, Y. -S. Wu, W. -C. Chien, S. Wu, R. Jose, S. J. Lue and C. -C. Yang, *ACS Appl. Energy Mater.*, 2020, **3**, 11024-11035.
- 16 Z. Cheng, H. Pan, C. Li, X. Mu, Y. Du, F. Zhang, X. Zhang, P. He and H. Zhou, *J. Mater. Chem. A*, 2020, **8**, 25217-25225.
- 17 R. Onozuka, C. Piedrahita, Y. Yanagida, K. Adachi, Y. Tsukahara and T. Kyu, *Solid State Ionics*, 2020, **346**, 115182.
- 18 H. Yue, J. Li, Q. Wang, C. Li, J. Zhang, Q. Li, X. Li, H. Zhang and S. Yang, *ACS Sustainable Chem. Eng.*, 2018, **6**, 268-274.
- 19 D. Zhang, L. Zhang, K. Yang, H. Wang, C. Yu, D. Xu, B. Xu and L. -M. Wang, *ACS Appl. Mater. Interfaces*, 2017, **9**, 36886-36896.
- 20 K. -H. Choi, S. -J. Cho, S. -H. Kim, Y. H. Kwon, J. Y. Kim and S. -Y. Lee, *Adv. Funct. Mater.*, 2014, **24**, 44-52.
- 21 X. Yu, J. Li and A. Manthiram, *ACS Materials Lett.*, 2020, **2**, 317-324.
- 22 N. Zhang, J. He, W. Han and Y. Wang, *J. Mater. Sci.*, 2019, **54**, 9603-9612.
- 23 S. Z. Zhang, X. L. Wang, X. H. Xia, Z. J. Yao, Y. J. Xu, D. H. Wang, D. Xie, J. B. Wu, C. D. Gu and J. P. Tu, *J. Power Sources*, 2019, **434**, 226726.
- 24 J. Peng, L. -N. Wu, J. -X. Lin, C. -G. Shi, J. -J. Fan, L. -B. Chen, P. Dai, L. Huang, J. -T. Li and S. -G. Sun, *J. Mater. Chem. A*, 2019, **7**, 19565-19572.
- 25 Z. Lin, X. Guo, Y. Yang, M. Tang, Q. Wei and H. Yu, *J. Energy Chem.*, 2021, **52**, 67-74.
- 26 Y. Seo, Y. -C. Jung, M. -S. Park and D. -W. Kim, *J. Membr. Sci.*, 2020, **603**, 117995.
- 27 R. Bouchet, S. Maria, R. Meziane, A. Aboulaich, L. Linenafa, J. -P. Bonnet, T. N. T. Phan, D. Bertin, D. Gigmes, D. Devaux, R. Denoyel and M. Armand, *Nat. Mater.*, 2013, **12**, 452-457.
- 28 S. J. Kwon, B. M. Jung, T. Kim, J. Byun, J. Lee, S. B. Lee and U. H. Choi,

- Macromolecules*, 2018, **51**, 10194-10201.
- 29 J. Hu, W. Wang, X. Zhu, S. Liu, Y. Wang, Y. Xu, S. Zhou, X. He and Z. Xue, *J. Membrane Sci.*, 2021, **618**, 118697.
- 30 W. Liu, S. W. Lee, D. Lin, F. Shi, S. Wang, A. D. Sendek and Y. Cui, *Nat. Energy*, 2017, **2**, 17035.
- 31 K. -H. Choi, S. -J. Cho, S. -H. Kim, Y. -H. Kwon, J. Y. Kim and S. -Y. Lee, *Adv. Funct. Mater.*, 2014, **24**, 44-52.
- 32 Y. Shi, Y. Chen, Y. Liang, J. Andrews, H. Dong, M. Yuan, W. Ding, S. Banerjee, H. Aedebili, M. L. Robertson, X. Cui and Y. Yao, *J. Mater. Chem. A*, 2019, **7**, 19691-19695.
- 33 X. Wang, G. M. A. Giraed, H. Zhu, R. Yunis, D. R. MacFarlane, D. Mecerreyes, A. J. Bhattacharyya, P. C. Howlett and M. Forsyth, *ACS Appl. Energy Mater.*, 2019, **2**, 6237-6245.
- 34 J. Wan, J. Xie, X. Kong, Z. Liu, K. Liu, F. Shi, A. Pei, H. Chen, W. Chen and J. Chen, *Nat. Nanotechnol.*, 2019, **14**, 705-711.
- 35 Z. Sun, Y. Li, S. Zhang, L. Shi, H. Wu, H. Bu and S. Ding, *J. Mater. Chem. A*, 2019, **7**, 11069-11076.
- 36 W. Tang, S. Tang, C. Zhang, Q. Ma, Q. Xiang, Y.W. Yang and J. Luo, *Adv. Energy Mater.*, 2018, **8**, 1800866.
- 37 J.-F. Wu and X. Guo, *J. Mater. Chem. A*, 2019, **7**, 2653–2659.
- 38 O. Sheng, J. Zheng, Z. Ju, C. Jin, Y. Wang, M. Chen, J. Nai, T. Liu, W. Zhang and Y. Liu, *Adv. Mater.*, 2020, **32**, 2000223.
- 39 W. Tang, S. Tang, X. Guan, X. Zhang, Q. Xiang and J. Luo, *Adv. Funct. Mater.*, 2019, **29**, 1900648.
- 40 Y.-J. Li, C.-Y. Fan, J.-P. Zhang and X.-L. Wu, *Dalton Trans.*, 2018, **47**, 14932-14937.
